# Supplementary material for: Delays in Coccidioidomycosis Diagnosis and Associated Healthcare Utilization, Tucson, Arizona, USA
Source: PubMed Central journal article supplement (PMC6711243; doi:10.3201/eid2509.190023), 2019-09
Supplement: 19-0023-Techapp-s1.pdf [file 19-0023-Techapp-s1.pdf]

# Delays in Coccidioidomycosis Diagnosis and Associated Healthcare Utilization, Tucson, Arizona, USA

## Appendix

**Appendix Table 1.** Patients in each of 2 cohorts of coccidioidomycosis study excluded for specific reasons and included by category of disease, Tucson, Arizona, USA

| Characteristic                | Cohort 1, no. (%) | Cohort 2, no. (%) | Total (%) |
|-------------------------------|-------------------|-------------------|-----------|
| <b>Excluded, by reason</b>    |                   |                   |           |
| History of coccidioidomycosis | 138 (57)          | 169 (57)          | 307 (57)  |
| Mistaken coding               | 35 (14)           | 24 (8)            | 59 (11)   |
| Age <18 y                     | 27 (11)           | 29 (10)           | 56 (10)   |
| Unconfirmed diagnosis         | 44 (18)           | 73 (25)           | 117 (22)  |
| Total                         | 244 (68)          | 295 (65)          | 539 (66)  |
| <b>Included, by disease</b>   |                   |                   |           |
| Acute symptomatic pulmonary   | 72 (62)           | 102 (64)          | 174 (63)  |
| Chronic pulmonary             | 16 (14)           | 8 (5)             | 24 (8)    |
| Pulmonary nodule              | 18 (15)           | 28 (17)           | 46 (17)   |
| Disseminated disease          | 10 (9)            | 22 (14)           | 32 (12)   |
| Total                         | 116 (32)          | 160 (35)          | 276 (34)  |
| Total charts reviewed         | 360               | 455               | 815       |

**Appendix Table 2.** Diagnostic delays and related costs for patients with coccidioidomycosis, by category of disease, Tucson, Arizona, USA

| Characteristic                                       | Acute symptomatic pulmonary | Chronic pulmonary      | Pulmonary nodule         | Disseminated           | Total                    |
|------------------------------------------------------|-----------------------------|------------------------|--------------------------|------------------------|--------------------------|
| Total no. patients                                   | N = 174                     | N = 24                 | N = 46                   | N = 32                 | N = 276                  |
| Median delay, d                                      | 19                          | 17                     | 54                       | 31                     | 23                       |
| Interquartile range of delay, d                      | 6–61                        | 4–47                   | 9–93                     | 10–137                 | 7–74                     |
| No. patients with no delay in diagnosis (total)*     | 12 (18)                     | 1 (4)                  | 3 (4)                    | 2 (4)                  | 18(30)                   |
| Median coccidioidomycosis-related cost (total cost†) | \$237<br>(\$237)            | \$96<br>(\$96)         | \$152<br>(\$471)         | \$271<br>(\$276)       | \$226<br>(\$237)         |
| Total coccidioidomycosis-related cost (total cost†)  | \$4,264<br>(\$4,303)        | \$96<br>(\$96)         | \$892<br>(\$1,306)       | \$542<br>(\$553)       | \$5,794 (\$6,258)        |
| No. patients with diagnosis delayed ≥1 d             | 156                         | 20                     | 42                       | 28                     | 246                      |
| Median delay, d                                      | 24                          | 19                     | 57                       | 41                     | 30                       |
| Interquartile delay, d                               | 10 - 67                     | 7 - 64                 | 12–118                   | 15 –150                | 10–82                    |
| Median coccidioidomycosis-related cost (total cost†) | \$918<br>(\$1,107)          | \$1,796<br>(\$1,877)   | \$3,157<br>(\$4,266)     | \$1,094<br>(\$1,608)   | \$1,419<br>(\$1,633)     |
| Total coccidioidomycosis-related cost (total cost†)  | \$279,740<br>(\$335,434)    | \$53,985<br>(\$56,844) | \$174,269<br>(\$222,066) | \$81,059<br>(\$97,799) | \$589,053<br>(\$712,143) |

\*This cost analysis includes 18 of the 30 patients because hospital costs associated with 12 patients were not required for diagnosis. For each category of disease, the number of patients with immediate ambulatory care diagnosis and the total number of patients in that category are shown.  
†Total hospital costs include coccidioidomycosis-related and non-coccidioidomycosis-related expenses.

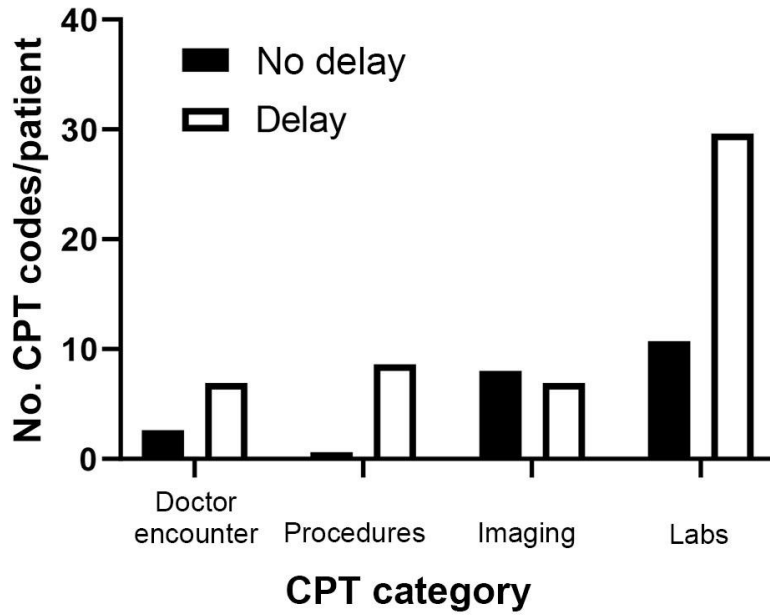

**Appendix Figure 1.** Coccidioidomycosis-related CPT codes by category for patients with (white) and without (black) delays in diagnosis.

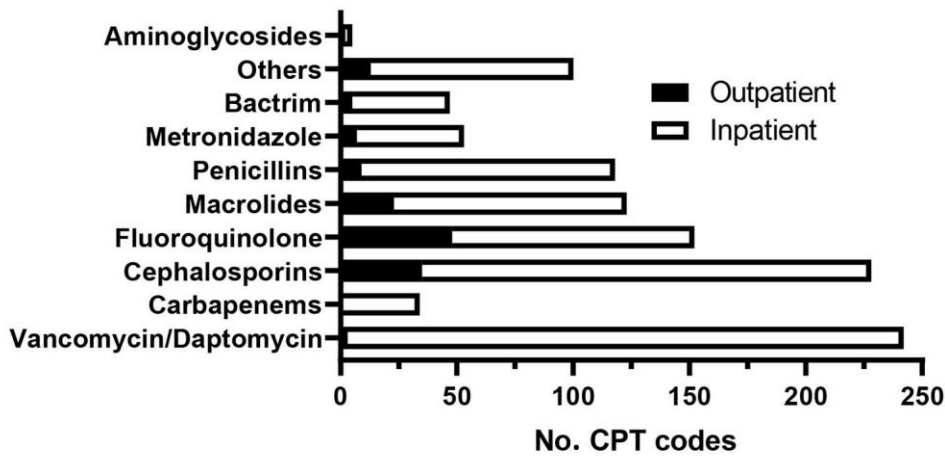

**Appendix Figure 2.** Use of antibacterial drugs before diagnosis for inpatient (white) and outpatient (black) care of patients with coccidioidomycosis infection, Tucson, Arizona, USA.
